# Supplementary material for: Lung Transplant Outcome From Selected Older Donors (≥70 Years) Equals Younger Donors (<70 Years): A Propensity-matched Analysis
Source: PubMed Central journal article supplement — Ann Surg. 2023 Feb 3;278(3):e641–9. doi: 10.1097/SLA.0000000000005813 (PMC10414152; doi:10.1097/sla.0000000000005813), 2023-02-03
Supplement: sla-278-e641-s001.pdf [file sla-278-e641-s001.pdf]

## **Supplemental Digital Content 1: Belgian law regarding patient rights and organ donation**

According to article 8 §2 of the Belgian law on patient rights, the patient must be informed in advance about the purpose, the nature, the grade of urgency, the possible contra-indications as well as potential complications and risks of the proposed procedure. In case of transplantation, our transplant candidates sign an informed consent at the moment that they are listed, in which it is specifically stated that the decision to accept and transplant an organ is a medical decision by the physicians of the transplant team, who accept or decline the offered organ based on their expertise and best clinical judgement. In Belgium, no specific consent is required regarding organ transplantation from extended-criteria donors (e.g., donation after circulatory death, donor CMV status, donor HCV status, etc.).

In addition, and according to article 4bis of the Belgian law on organ transplantation, it is strictly forbidden to communicate any donor information that could reveal to the recipient directly or indirectly the identity of the donor.
