# Supplementary material for: Lung Transplant Outcome From Selected Older Donors (≥70 Years) Equals Younger Donors (<70 Years): A Propensity-matched Analysis
Source: PubMed Central journal article supplement — Ann Surg. 2023 Feb 3;278(3):e641–9. doi: 10.1097/SLA.0000000000005813 (PMC10414152; doi:10.1097/sla.0000000000005813), 2023-02-03
Supplement: sla-278-e641-s002.pdf [file sla-278-e641-s002.pdf]

Supplemental Digital Content 2: Octogenarian donors

| N° | Year | DONOR       |                   |                    |        |                          |                        |     |    |                     |                                 | RECIPIENT                            |            |                         |       |        |                          |      |                     |
|----|------|-------------|-------------------|--------------------|--------|--------------------------|------------------------|-----|----|---------------------|---------------------------------|--------------------------------------|------------|-------------------------|-------|--------|--------------------------|------|---------------------|
|    |      | Age (years) | Type <sup>1</sup> | Blood <sup>2</sup> | Gender | BMI (kg/m <sup>2</sup> ) | Cause of death         | HT  | DM | Smoker <sup>3</sup> | Ventilator <sup>4</sup> (hours) | PaO <sub>2</sub> <sup>5</sup> (mmHg) | Age (year) | Indication <sup>6</sup> | Blood | Gender | BMI (kg/m <sup>2</sup> ) | LAS  | Waiting list (days) |
| 1  | 2016 | 82          | DBD               | O                  | Female | 25.9                     | Trauma capitis         | No  | No | Yes                 | 53                              | 497                                  | 65         | COPD                    | O     | Female | 28.0                     | 27   | 239                 |
| 2  | 2019 | 81          | DBD               | A                  | Female | 22.4                     | Intracerebral bleeding | No  | No | No                  | 70                              | 366                                  | 65         | PF                      | A     | Female | 22.9                     | 28   | 313                 |
| 3  | 2019 | 83          | DBD               | O                  | Female | 21.0                     | Intracerebral bleeding | No  | No | No                  | 70                              | 525                                  | 64         | COPD                    | O     | Female | 22.3                     | 27.5 | 506                 |
| 4  | 2020 | 80          | DBD               | O                  | Female | 25.7                     | Intracerebral bleeding | Yes | No | No                  | 69                              | 522                                  | 54         | COPD                    | O     | Female | 23.2                     | 27   | 548                 |
| 5  | 2020 | 83          | DBD               | A                  | Female | 24.6                     | Intracerebral bleeding | Yes | No | No                  | 72                              | 329                                  | 60         | COPD                    | A     | Female | 24.5                     | 28   | 746                 |
| 6  | 2020 | 84          | DBD               | O                  | Female | 20.2                     | Intracerebral bleeding | Yes | No | No                  | 12                              | 459                                  | 58         | COPD                    | O     | Female | 25.3                     | 28   | 478                 |

<sup>1</sup> donor type

<sup>2</sup> blood type

<sup>3</sup> history of smoking

<sup>4</sup> time on ventilator prior to lung procurement

<sup>5</sup> latest PaO<sub>2</sub>/FIO<sub>2</sub> ratio prior to lung procurement

<sup>6</sup> indication for lung transplantation

BMI, body mass index; COPD, chronic obstructive pulmonary disease; DBD, donation after brain death; DCD, donation after circulatory death; DM, diabetes mellitus; HT, hypertension; LAS, lung allocation score; PF, pulmonary fibrosis

| N° | Year | SURGICAL |      |                     |                    |                     |                    | OUTCOME |         |         |         |                                |                         |                              |      |          |                |
|----|------|----------|------|---------------------|--------------------|---------------------|--------------------|---------|---------|---------|---------|--------------------------------|-------------------------|------------------------------|------|----------|----------------|
|    |      | EVLP     | ECMO | CIT right (minutes) | CIT left (minutes) | WIT right (minutes) | WIT left (minutes) | PGD 0h  | PGD 24h | PGD 48h | PGD 72h | Ventilator <sup>1</sup> (days) | ICU <sup>2</sup> (days) | Hospital <sup>3</sup> (days) | CLAD | Survival | Cause of death |
| 1  | 2016 | No       | No   | 247                 | 354                | 52                  | 63                 | 3       | 2       | 2       | 2       | 20                             | 48                      | 113                          | No   | Death    | Ischemic CVA   |
| 2  | 2019 | No       | No   | 259                 | 449                | 80                  | 67                 | 0       | 0       | 0       | 1       | 2                              | 11                      | 30                           | No   | Alive    | /              |
| 3  | 2019 | No       | No   | 250                 | 427                | 75                  | 74                 | 0       | 2       | 2       | 2       | 1                              | 5                       | 29                           | No   | Alive    | /              |
| 4  | 2020 | Yes      | No   | 320                 | 479                | 65                  | 64                 | 0       | 0       | 0       | 0       | 18                             | 212                     | 238                          | No   | Alive    | /              |
| 5  | 2020 | No       | Yes  | 212                 | 491                | 74                  | 91                 | 3       | 3       | 3       | 3       | 3                              | 9                       | 77                           | No   | Alive    | /              |
| 6  | 2020 | No       | No   | 220                 | 422                | 84                  | 62                 | 0       | 0       | 0       | 0       | 2                              | 4                       | 48                           | No   | Alive    | /              |

<sup>1</sup> time to extubation

<sup>2</sup> duration of hospitalization at the intensive care unit

<sup>3</sup> duration of hospitalization

CIT, cold ischemia time; CLAD, chronic lung allograft dysfunction; CVA, cerebrovascular accident; ECMO; extracorporeal membrane oxygenation; EVLP, ex-vivo lung perfusion; ICU, intensive care unit; PGD, primary graft dysfunction; WIT, warm ischemia time
