# Supplementary material for: Lung Transplant Outcome From Selected Older Donors (≥70 Years) Equals Younger Donors (<70 Years): A Propensity-matched Analysis
Source: PubMed Central journal article supplement — Ann Surg. 2023 Feb 3;278(3):e641–9. doi: 10.1097/SLA.0000000000005813 (PMC10414152; doi:10.1097/sla.0000000000005813), 2023-02-03
Supplement: sla-278-e641-s003.pdf [file sla-278-e641-s003.pdf]

### Supplemental Digital Content 3: PGD-scoring

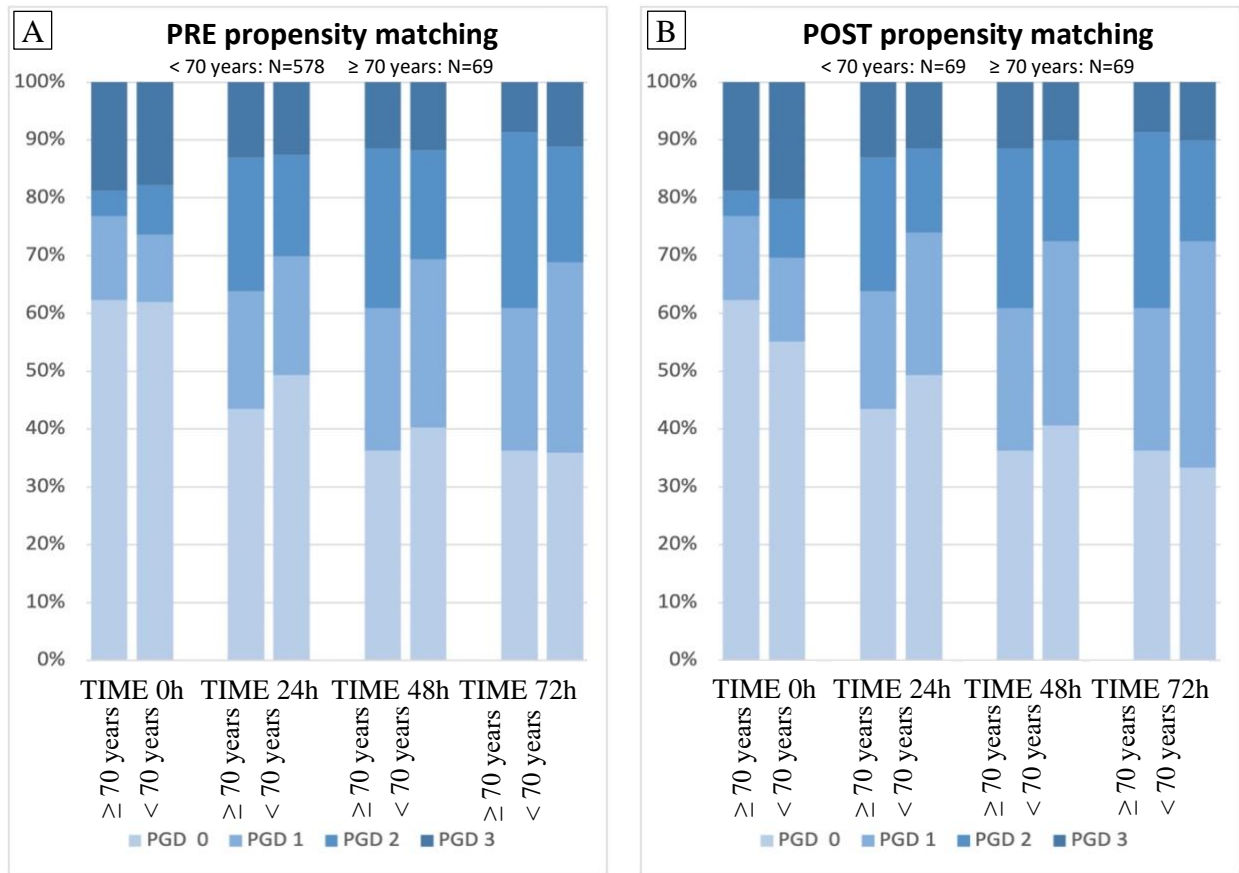

|                  | Entire cohort   | Propensity-matched cohort | Propensity-matched cohort |
|------------------|-----------------|---------------------------|---------------------------|
|                  | < 70 years      | < 70 years                | ≥ 70 years                |
| <b>Any PGD-3</b> | 27.7% (160/578) | 29.0% (20/69)             | 26.1% (18/69)             |

**Figure legend:**

- Panel A and B provide an overview of the primary graft dysfunction (PGD) scores at 0, 24, 48, and 72 hours post lung transplantation. In the graph on the left (A), the entire younger cohort (< 70 years) is compared with the older cohort (≥ 70 years). On the right (B), the propensity-matched cohorts of younger (< 70 years) and older (≥ 70 years) donors are compared.
- Panel C displays the percentages of any PGD-3 within the first 72 hours post lung transplantation for the entire younger (< 70 years) donor cohort and the propensity-matched cohorts. There is no difference in the incidence of PGD-3 among the groups.
