# Supplementary material for: Lung Transplant Outcome From Selected Older Donors (≥70 Years) Equals Younger Donors (<70 Years): A Propensity-matched Analysis
Source: PubMed Central journal article supplement — Ann Surg. 2023 Feb 3;278(3):e641–9. doi: 10.1097/SLA.0000000000005813 (PMC10414152; doi:10.1097/sla.0000000000005813), 2023-02-03
Supplement: sla-278-e641-s005.pdf [file sla-278-e641-s005.pdf]

### Supplemental Digital Content 5: Distribution of recipient age

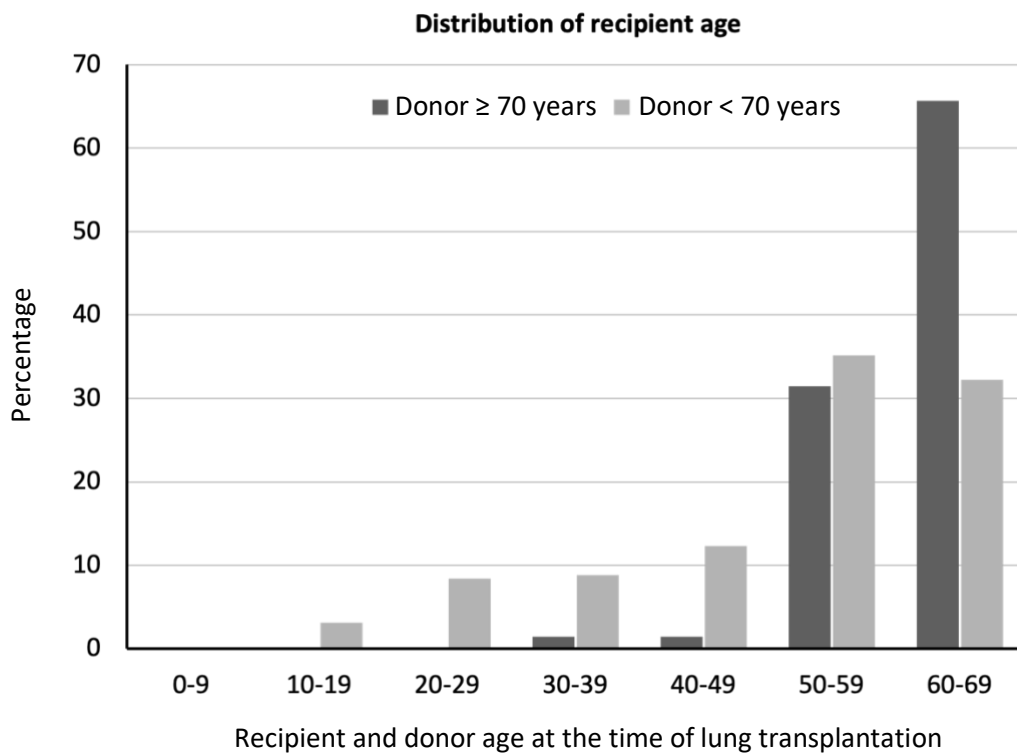

**Figure legend:** Overview of the relative percentage per 10-year age category depending on donor age ( $<$  70 years vs.  $\geq$  70 years) for all patients who underwent lung transplantation at the University Hospitals Leuven between January 1<sup>st</sup>, 2010 and December 31<sup>st</sup>, 2020. In this experience, lungs from older donors are more frequently assigned to older recipients (old-for-old strategy).
